# Supplementary material
Source: PubMed Central journal article supplement (PMC9166328)
Supplement: JCOPDF-9-111-s001.pdf [file JCOPDF-9-111-s001.pdf]

## Online Supplement

### Forced Expiratory Flow at 25%-75% Links COPD Physiology to Emphysema and Disease Severity in the SPIROMICS Cohort

Bonnie E. Ronish, MD<sup>1</sup> David J. Couper, PhD<sup>2</sup> Igor Z. Barjaktarevic, MD, PhD<sup>3</sup> Christopher B. Cooper, MD<sup>3, 4</sup> Richard E. Kanner, MD<sup>1</sup> Cheryl S. Pirozzi, MD, MS<sup>1</sup> Victor Kim, MD<sup>5</sup> James M. Wells, MD<sup>6</sup> MeiLan K. Han, MD, MS<sup>7</sup> Prescott G. Woodruff, MD, MPH<sup>8</sup> Victor E. Ortega, MD, PhD<sup>9</sup> Stephen P. Peters, MD, PhD<sup>10</sup> Eric A. Hoffman, PhD<sup>11</sup> Russell G. Buhr, MD, PhD<sup>3,12</sup> Brett A. Dolezal, PhD<sup>3</sup> Donald P. Tashkin, MD<sup>3</sup> Theodore G. Liou, MD<sup>1</sup> Lori A. Bateman, MS<sup>2</sup> Joyce D. Schroeder, MD<sup>13</sup> Fernando J. Martinez, MD, MS<sup>14</sup> R. Graham Barr, MD, PhD<sup>15</sup> Nadia N. Hansel, MD, MPH<sup>16</sup> Alejandro P. Comellas, MD<sup>17</sup> Stephen I. Rennard, MD<sup>18</sup> Mehrdad Arjomandi, MD<sup>8,19</sup> Robert Paine III, MD<sup>1</sup>

<sup>1</sup>Division of Respiratory, Critical Care, and Occupational Pulmonary Medicine, University of Utah, Salt Lake City, Utah, United States

<sup>2</sup>Department of Biostatistics, The University of North Carolina at Chapel Hill, Chapel Hill, North Carolina, United States

<sup>3</sup>Division of Pulmonary and Critical Care, Department of Medicine, David Geffen School of Medicine, University of California at Los Angeles, Los Angeles, California, United States

<sup>4</sup>Department of Physiology, David Geffen School of Medicine, University of California at Los Angeles, Los Angeles, California, United States

<sup>5</sup>Department of Thoracic Medicine and Surgery, Lewis Katz School of Medicine, Temple University Hospital, Philadelphia, Pennsylvania, United States

<sup>6</sup>Division of Pulmonary, Allergy, and Critical Care Medicine, University of Alabama at Birmingham, Birmingham, Alabama, United States

<sup>7</sup>Division of Pulmonary and Critical Care Medicine, University of Michigan, Ann Arbor, Michigan, United States

<sup>8</sup>Department of Medicine, University of California San Francisco, San Francisco, California, United States

<sup>9</sup>Division of Internal Medicine, Wake Forest School of Medicine, Winston Salem, North Carolina, United States

<sup>10</sup>Division of Internal Medicine, Wake Forest University Health Sciences, Winston-Salem, North Carolina, United States

<sup>11</sup>Division of Physiologic Imaging, Department of Radiology, University of Iowa Carver College of Medicine, Iowa City, Iowa, United States

<sup>12</sup>Center for the Study of Healthcare Innovation, Implementation, and Policy, VA Health Services Research and Development, Greater Los Angeles Veterans Affairs Healthcare System, Los Angeles, California, United States

<sup>13</sup>Division of Radiology and Imaging Sciences, University of Utah, Salt Lake City, Utah, United States

<sup>14</sup>Division of Pulmonary and Critical Care, Weill Cornell Medicine, New York, New York, United States

<sup>15</sup>Department of Internal Medicine, Columbia University, New York, New York, United States

<sup>16</sup>Division of Pulmonary and Critical Care Medicine, Johns Hopkins University School of Medicine, Baltimore, Maryland, United States

<sup>17</sup> Division of Pulmonary, Critical Care and Occupational Medicine, Department of Internal Medicine, University of Iowa, Iowa City, Iowa, United States

<sup>18</sup>Department of Internal Medicine, University of Nebraska Medical Center, Omaha, Nebraska, United States

<sup>19</sup>San Francisco Veterans Affairs Healthcare System, San Francisco, California, United States

| Variable    |                                | Unadjusted for %predFEV <sub>1</sub> <sup>a</sup> |         | Adjusted for %predFEV <sub>1</sub> <sup>b</sup> |         |
|-------------|--------------------------------|---------------------------------------------------|---------|-------------------------------------------------|---------|
|             |                                | OR (95% CI)                                       | P value | OR (95% CI)                                     | P value |
| Categorical | Emph                           | <b>1.754 (1.671, 1.840)</b>                       | <0.0001 | <b>1.760 (1.605, 1.929)</b>                     | <0.0001 |
|             | BDR (FVC or FEV <sub>1</sub> ) | <b>1.545 (1.485, 1.607)</b>                       | <0.0001 | <b>1.160 (1.074, 1.252)</b>                     | <0.0001 |
|             | mMRC                           | 1.271 (1.227, 1.316)                              | <0.0001 | 0.922 (0.865, 0.983)                            | 0.013   |
|             | CB                             | 1.078 (1.047, 1.109)                              | <0.0001 | 0.981 (0.923, 1.041)                            | 0.523   |
| Variable    |                                | Estimate (95% CI)                                 | P value | Estimate (95% CI)                               | P value |
| Continuous  | PRM <sup>fSAD</sup>            | <b>2.586 (2.445, 2.726)</b>                       | <0.0001 | <b>1.394 (1.335, 1.655)</b>                     | <0.0001 |
|             | Emph-C                         | <b>1.497 (1.403, 1.592)</b>                       | <0.0001 | <b>0.619 (0.453, 0.786)</b>                     | <0.0001 |
|             | TLC                            | <b>84.918 (71.072, 98.764)</b>                    | <0.0001 | <b>132.677 (105.060, 160.295)</b>               | <0.0001 |
|             | RV                             | <b>166.623 (156.228, 177.018)</b>                 | <0.0001 | <b>72.334 (53.975, 90.693)</b>                  | <0.0001 |
|             | RV/TLC                         | 0.023 (0.021, 0.024)                              | <0.0001 | 0.0021 (-0.001, 0.005)                          | 0.126   |
|             | Pi10                           | 0.002 (0.001, 0.003)                              | <0.0001 | -0.006 (-0.008, -0.004)                         | <0.0001 |
|             | CAT                            | 0.733 (0.647, 0.818)                              | <0.0001 | -0.114 (-0.285, 0.058)                          | 0.195   |
|             | 6MWD                           | -7.418 (-8.685, -6.150)                           | <0.0001 | 1.500 (-1.039, 4.040)                           | 0.247   |
|             | SGRQ score                     | 2.370 (2.163, 2.577)                              | <0.0001 | -0.302 (-0.708, 0.104)                          | 0.145   |

**e-Table S1: Prebronchodilator analysis of %predFEF<sub>25-75</sub>% and clinical parameters.** <sup>a</sup>Adjusted for smoking pack year history. <sup>b</sup>Adjustment includes percent predicted FEV<sub>1</sub> (%predFEV<sub>1</sub>) and its square. Emph = emphysema (binary variable below -950HU), BDR = bronchodilator response, FEV<sub>1</sub> = forced expiratory volume in one second, FVC = forced vital capacity, mMRC = modified Medical Research Council score (Binary variable grouped as MRC score 0-1 for no clinically significant dyspnea and 2-4 for significant dyspnea), CB = Chronic bronchitis. PRM<sup>fSAD</sup> = parametric response mapping functional small airways disease, TLC = total lung capacity, Emph-C = emphysema as a continuous variable, Pi10 = airway thickness relative to reference airway of 10mm, RV = residual volume, RV/TLC = ratio of residual volume to total lung capacity, CAT = COPD assessment test score, 6MWD = 6-minute walk distance, SGRQ = St. George's Respiratory Questionnaire dyspnea score. OR = Odds ratio, CI = Confidence Interval. Boldface indicates a result that retains significance and relationship integrity after adjustment for %predFEV<sub>1</sub>. Values are presented per 10% reduction in %predFEF<sub>25-75</sub>.

| Variable    |                                | Unadjusted for %predFEV <sub>1</sub> <sup>a</sup> |                   | Adjusted for %predFEV <sub>1</sub> <sup>b</sup> |                   |
|-------------|--------------------------------|---------------------------------------------------|-------------------|-------------------------------------------------|-------------------|
|             |                                | OR (95% CI)                                       | P value           | OR (95% CI)                                     | P value           |
| Categorical | Emph                           | <b>1.663 (1.593, 1.736)</b>                       | <b>&lt;0.0001</b> | <b>1.534 (1.425, 1.650)</b>                     | <b>&lt;0.0001</b> |
|             | BDR (FVC or FEV <sub>1</sub> ) | <b>1.347 (1.308, 1.387)</b>                       | <b>&lt;0.0001</b> | <b>1.444 (1.365, 1.527)</b>                     | <b>&lt;0.0001</b> |
|             | mMRC                           | 1.237 (1.201, 1.275)                              | <0.0001           | 0.934 (0.896, 0.984)                            | 0.0078            |
|             | CB                             | 1.065 (1.040, 1.092)                              | <0.0001           | 1.042 (0.997, 1.089)                            | 0.0673            |
| Variable    |                                | Estimate (95% CI)                                 | P value           | Estimate (95% CI)                               | P value           |
| Continuous  | PRM <sup>fSAD</sup>            | <b>2.273 (2.154, 2.392)</b>                       | <b>&lt;0.0001</b> | <b>0.873 (0.668, 1.078)</b>                     | <b>&lt;0.0001</b> |
|             | TLC                            | <b>75.054 (63.184, 86.924)</b>                    | <b>&lt;0.0001</b> | <b>59.768 (38.386, 81.150)</b>                  | <b>&lt;0.0001</b> |
|             | RV                             | <b>146.206 (137.365, 155.048)</b>                 | <b>&lt;0.0001</b> | <b>17.255 (2.415, 32.095)</b>                   | <b>0.0227</b>     |
|             | Emph-C                         | 1.318 (1.237, 1.398)                              | <0.0001           | 0.002 (-0.130, 0.134)                           | 0.9783            |
|             | RV/TLC                         | 0.020 (0.019, 0.021)                              | <0.0001           | 0.001 (-0.002, 0.003)                           | 0.6007            |
|             | Pi10                           | 0.002 (0.001, 0.002)                              | <0.0001           | -0.004 (-0.006, -0.003)                         | <0.0001           |
|             | CAT                            | 0.647 (0.574, 0.720)                              | <0.0001           | -0.019 (-0.147, 0.110)                          | 0.7731            |
|             | 6MWD                           | -6.724 (-7.810, -5.639)                           | <0.0001           | 1.532 (-0.377, 3.442)                           | 0.1159            |
|             | SGRQ score                     | 2.086 (1.910, 2.263)                              | <0.0001           | -0.108 (-0.409, 0.193)                          | 0.4815            |

**e-Table S2: Postbronchodilator analysis of %predFEF<sub>25-75%</sub> and clinical parameters using a linear model.** <sup>a</sup>Adjusted for smoking pack year history. <sup>b</sup>Adjustment includes percent predicted FEV<sub>1</sub> (%predFEV<sub>1</sub>). Emph = emphysema (binary variable below -950HU), BDR = bronchodilator response, FEV<sub>1</sub> = forced expiratory volume in one second, FVC = forced vital capacity, mMRC = modified Medical Research Council score (Binary variable grouped as MRC score 0-1 for no clinically significant dyspnea and 2-4 for significant dyspnea), CB = Chronic bronchitis. PRM<sup>fSAD</sup> = parametric response mapping functional small airways disease, TLC = total lung capacity, Emph-C = emphysema as a continuous variable, Pi10 = airway thickness relative to reference airway of 10mm, RV = residual volume, RV/TLC = ratio of residual volume to total lung capacity, CAT = COPD assessment test score, 6MWD = 6-minute walk distance, SGRQ = St. George's Respiratory Questionnaire dyspnea score. OR = Odds ratio, CI = Confidence Interval. Boldface indicates a result that retains significance and relationship integrity after adjustment for %predFEV<sub>1</sub>. Values are presented per 10% reduction in %predFEF<sub>25-75</sub>

| Variable    |                                | Unadjusted for %predFVC <sup>a</sup> |         | Adjusted for %predFVC <sup>b</sup> |         |
|-------------|--------------------------------|--------------------------------------|---------|------------------------------------|---------|
|             |                                | OR (95% CI)                          | P value | OR (95% CI)                        | P value |
| Categorical | Emph                           | 1.663 (1.593, 1.736)                 | <0.0001 | 1.761 (1.674, 1.853)               | <0.0001 |
|             | BDR (FVC or FEV <sub>1</sub> ) | 1.347 (1.308, 1.387)                 | <0.0001 | 1.397 (1.351, 1.444)               | <0.0001 |
| Variable    |                                | Estimate (95% CI)                    | P value | Estimate (95% CI)                  | P value |
| Continuous  | PRM <sup>fSAD</sup>            | 2.273 (2.154, 2.392)                 | <0.0001 | 2.151 (2.022, 2.279)               | <0.0001 |
|             | TLC                            | 75.054 (63.184, 86.924)              | <0.0001 | 95.612 (82.905, 108.319)           | <0.0001 |

**e-Table S3: Postbronchodilator analysis of %predFEF<sub>25-75%</sub> and strongest clinical associations with adjustment for %predFVC** <sup>a</sup>Adjusted for age, sex, smoking pack year history. <sup>b</sup>Adjustment includes percent predicted forced vital capacity (%predFVC) and its square. Emph = emphysema (binary variable below -950HU), BDR = bronchodilator response, FEV<sub>1</sub> = forced expiratory volume in one second, FVC = forced vital capacity. PRM<sup>fSAD</sup> = parametric response mapping functional small airways disease, TLC = total lung capacity. OR = Odds ratio, CI = Confidence Interval. Values are presented per 10% reduction in %predFEF<sub>25-75</sub>.
